# Supplementary material for: Green synthesis, photocatalytic and photoelectrochemical performance of an Au–Graphene nanocomposite
Source: Royal Society of Chemistry journal article supplement (doi:10.1039/c5ra01864a), 2015-01-01
Supplement: c5ra01864a1.pdf [file c5ra01864a1.pdf]

Electronic Supplementary Information

## Green Synthesis, Photocatalytic and Photoelectrochemical Performance of Au-Graphene Nanocomposite<sup>†</sup>

Mohammad Ehtisham Khan<sup>a</sup>, Mohammad Mansoob Khan<sup>a,b\*</sup>, and Moo Hwan Cho<sup>a\*</sup>

<sup>a</sup>*School of Chemical Engineering, Yeungnam University, Gyeongsan-si, Gyeongbuk 712-749, South Korea. Phone: +82-53-810-2517, Fax: +82-53- 810-4631.*

<sup>b</sup>*Chemical Sciences, Faculty of Science, Universiti Brunei Darussalam, Jalan Tungku Link, BE1410, Brunei Darussalam*

*\*Email: mhcho@ynu.ac.kr, mmansoobkhan@yahoo.com*

### UV-vis diffuse reflectance spectra of P-G and Au-G nanocomposites

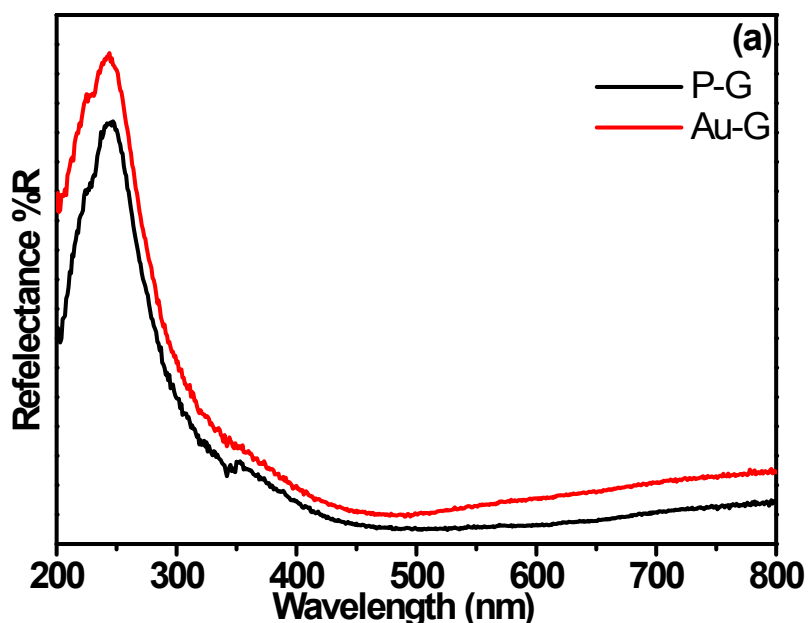

Fig. S1. (a) UV-Vis reflectance spectra of P-G and Au-G nanocomposite.

### Acquired HAADF of Au-G nanocomposite

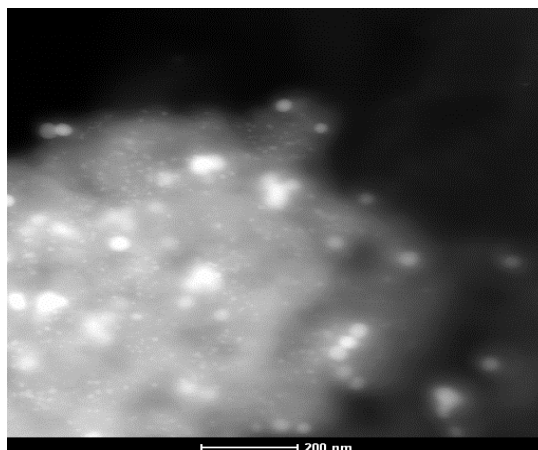

**Fig. S2.** Representative HAADF FE-TEM image of Au-G nanocomposite.

### EDS of Au-G nanocomposite

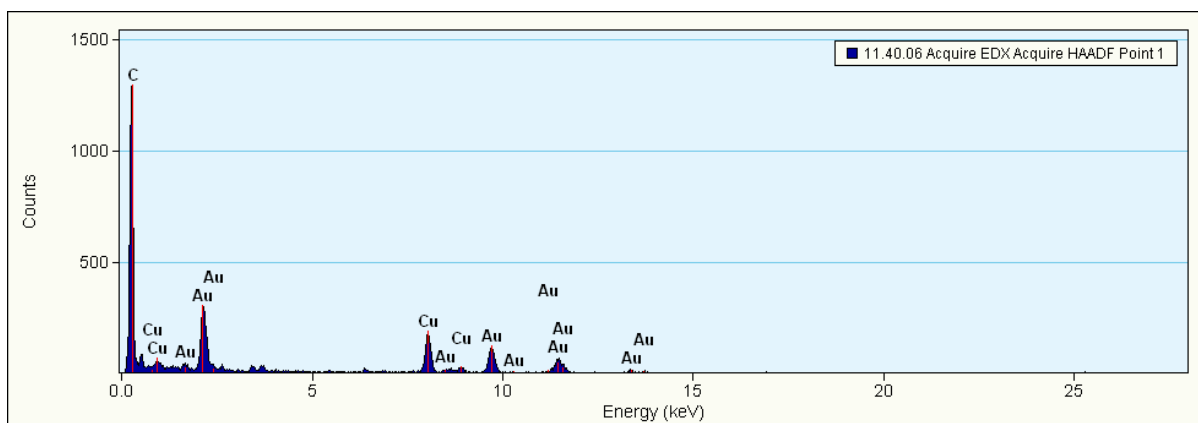

**Fig. S3.** EDS analysis of Au-G nanocomposite.

**Table S1.** Elemental composition of Au-G nanocomposite.

| Element | Weight % | Atomic % | Uncert. % | Correction | k-Factor |
|---------|----------|----------|-----------|------------|----------|
| C-K     | 70.08    | 97.46    | 1.34      | 0.26       | 3.940    |
| Au-M    | 29.91    | 2.53     | 0.77      | 0.75       | 5.653    |
